# Supplementary material for: Vaccination against Clostridium difficile by Use of an Attenuated Salmonella enterica Serovar Typhimurium Vector (YS1646) Protects Mice from Lethal Challenge
Source: PubMed Central journal article supplement (PMC6652760; doi:10.1128/iai.00089-19), 2019-07-23
Supplement: IAI.00089-19-s0001.pdf [file IAI.00089-19-s0001.pdf]

## Supplemental Table 1

### Primers used in Plasmid Construction

|                                     | Forward Primer (5' --> 3')                                                                                                                                  | Reverse Primer (5' --> 3')       | Source                      |
|-------------------------------------|-------------------------------------------------------------------------------------------------------------------------------------------------------------|----------------------------------|-----------------------------|
| SopE2 promoter and secretory signal | CCGCTCGAGTAAAAATGTTCTCGATAAA                                                                                                                                | CATGGTAGTTCCTTTTAG               | YS1646                      |
| SptP promoter and secretory signal  | CGCCTCGAGTTTACGCTGACTCAT TGG                                                                                                                                | CATTTTTCTCTCCTCATACTTTA          | YS1646                      |
| SseJ promoter and secretory signal  | CGCCTCGAGACATAAAACACTAGC ACT                                                                                                                                | CGCCTCGAGACATAAAACACTAG CACT     | YS1646                      |
| SspH1 promoter and secretory signal | CGCCTCGAGCGCTATATCACCAAA AC                                                                                                                                 | CTCTGCGGCCGCGGTAAGACCTG ACGCTC   | YS1646                      |
| SspH2 promoter and secretory signal | CGCCTCGAGGTTTGTGCGTCGTAT                                                                                                                                    | CTCTGCGGCCGCATTCAGGCAGG CACGCA   | YS1646                      |
| SteA promoter and secretory signal  | CGCCTCGAGGTTTCGCCGCATGTT G                                                                                                                                  | CTCTGCGGCCGCATAAATTGTCCA AATAGT  | YS1646                      |
| SteB promoter and secretory signal  | CGCCTCGAGCGCTCCAGCGCTTCG A                                                                                                                                  | CTCTGCGGCCGCTCTGACATTAC CATT     | YS1646                      |
| Lac promoter                        | CGCCTCGAGCATTAGGCACCCAG GCTTTACACTTTATGCTTCCGGCTC GTATGTTGTGTGGAATTGTGAGCG GATAA, GTGGAATTGTGAGCGGATAACAAT TTCACACAGGAAACAGCTATGACC ATGACTAACATAACACTATCCAC |                                  | Sequence is in the primers  |
| nirB promoter                       | CGCCTCGAGTTGTGGTTACCGGCC CGAT                                                                                                                               | CGCGCGGCCCGCCGATCTTTACT CGCATTAC | DH5 $\alpha$ <i>E. coli</i> |
| pagC promoter                       | CGCCTCGAGGTTAACC ACTCTTAA TAA                                                                                                                               | AACA ACTCCT TAATACTACT           | YS1646                      |
| SopE2 Secretion Signal              | GGCGGTAATAGAAAAGAAATCGA GGCAAAAATGACTAACATAACACT ATCCAC                                                                                                     | AAGTCGCGGCCCGCCGATCTTTA CTCGC    | YS1646                      |
| SspH1 Secretion Signal              | GGCGGTAATAGAAAAGAAATCGA GGCAAAAATGTTTAATATCCGCAA TACACAACCTT                                                                                                | CTCTGCGGCCGCGGTAAGACCTG ACGCTC   | YS1646                      |
| rbdA                                | CGCGCGGCCGCGACTTATTACTAT GAT                                                                                                                                | TAGTCGGCGCGCCCGCCATATAT CCCAGG   | VPI 10463                   |
| rbdB                                | CCGGCGGCCGAGAGAAATTTTAT ATTAAT                                                                                                                              | AGTCGGCGCGCCGTTCACTAATC ACTAATTG | VPI 10463                   |
| EGFP                                | CGCGCGGCCGCGGTGAGCAAGGG CGAG                                                                                                                                | AGTCGGCGCGCCTTACTTGTACA GCTCGTC  | pEGFP_C1                    |

Primers used to replicate the sequences from source DNA are shown. Some sequences were further edited to include an ATG start site between the promoter and secretory signal.

## Supplemental Table 2

### *In vitro* and *in vivo* screening of plasmids

| Strains          | <i>In vitro</i>                             |                    |                         |                    |                    |                    | <i>In vivo</i> (IM Prime, PO Boost) |      |                |      |
|------------------|---------------------------------------------|--------------------|-------------------------|--------------------|--------------------|--------------------|-------------------------------------|------|----------------|------|
|                  | EGFP Detection<br>(EGFP expressing strains) |                    | Antigen Detection by WB |                    |                    |                    | Serum IgG                           |      | Intestinal IgA |      |
|                  | LB                                          | RAW 264.7<br>(24h) | LB                      | Secretion<br>in LB | RAW 264.7<br>(1hr) | RAW 264.7<br>(24h) | rbdB                                | rbdA | rbdB           | rbdA |
| pQE_null         | 0                                           | 0                  | 0                       | 0                  | 0                  | 0                  | 0                                   | 0    | 0              | 0    |
| SopE2_SopE2_rbdB | +++                                         | +++                | +                       | 0                  | 0                  | 0                  | 0                                   | <ctl | 0              | <ctl |
| SseJ_SseJ_rbdB   | +                                           | ++                 | +                       | 0                  | 0                  | 0                  | ++                                  | <ctl | 0              | 0    |
| SptP_SptP_rbdB   | +                                           | +                  | +                       | 0                  | +                  | 0                  | +                                   | <ctl | +              | 0    |
| SspH1_SspH1_rbdB | +                                           | +                  | 0                       | 0                  | 0                  | 0                  | ++                                  | <ctl | ++             | 0    |
| SspH2_SspH2_rbdB | ++                                          | ++                 | 0                       | 0                  | 0                  | 0                  | +++                                 | <ctl | +++            | 0    |
| SteA_SteA_rbdB   | +++                                         | ++                 | +                       | 0                  | 0                  | 0                  | ++                                  | <ctl | +++            | 0    |
| SteB_SteB_rbdB   | +                                           | +++                | 0                       | 0                  | 0                  | 0                  | <ctl                                | <ctl | 0              | 0    |
| pagC_SspH1_rbdB  | n/a                                         | +++                | +                       | n/a                | +                  | 0                  | n/a                                 | n/a  | n/a            | n/a  |
| SspH2_SspH2_rbdA | ++                                          | ++                 | 0                       | n/a                | 0                  | 0                  | n/a                                 | n/a  | n/a            | n/a  |
| lac_SopE2_rbdA   | +                                           | +                  | +                       | 0                  | 0                  | 0                  | <ctl                                | <ctl | 0              | 0    |
| lac_SspH1_rbdA   | 0                                           | 0                  | 0                       | 0                  | 0                  | 0                  | <ctl                                | <ctl | 0              | 0    |
| nirB_SopE2_rbdA  | ++                                          | +                  | +                       | 0                  | +                  | 0                  | <ctl                                | <ctl | 0              | ++   |
| nirB_SspH1_rbdA  | ++                                          | +++                | +                       | 0                  | +                  | 0                  | <ctl                                | <ctl | 0              | 0    |
| pagC_SopE2_rbdA  | n/a                                         | ++                 | 0                       | 0                  | 0                  | 0                  | <ctl                                | <ctl | 0              | +++  |
| pagC_SspH1_rbdA  | n/a                                         | +++                | +                       | +                  | +                  | 0                  | <ctl                                | <ctl | 0              | +++  |

EGFP detection is based on the EGFP expressing strains with the same promoter and secretory signal as the listed strain. Strains that were not assessed are indicated in the table as “n/a”. Detection by Western blot is designated as either antigen is detected “+” or not “0”. For *in vivo* screening, mice were vaccinated with 10ug of protein IM (rbdA/rbdB) adjuvanted with alum and three weeks later the response was boosted by the YS1646 strains given by PO in 3 doses (n=2-4 mice/group). Serum and intestines were collected 3 weeks after the boost. Titers are shown compared to the control group of the listed protein delivered IM, boosted with pQE\_null strain of YS1646. Titers lower than the control are listed as “<ctl”. Titers that match the control are listed as “0”. Titers higher than the control were divided into three categories; “+”, “++”, “+++” with increasing mean titers.

### Supplemental Table 3

#### Correlations between antibody titers and clinical scores

|                     |         | Tox A IgG Pre | Tox A IgG Post      | Tox A IgA Post   | rbdB IgG Pre       | rbdB IgG Post      | rbdB IgA Post      | Salmonella IgG Pre  | Salmonella IgG Post |
|---------------------|---------|---------------|---------------------|------------------|--------------------|--------------------|--------------------|---------------------|---------------------|
| Mean Score (all)    | p value | ns            | ns                  | ns               | ****               | ****               | **                 | *                   | ns                  |
|                     | r       | /             | /                   | /                | -0.735             | -0.6555            | -0.5047            | -0.4031             | /                   |
|                     | 95% CI  | /             | /                   | /                | (-0.8554, -0.5392) | (-0.8189, -0.3939) | (-0.7278, -0.1849) | (-0.6433, -0.09067) | /                   |
| Mean Score (vax)    | p value | ns            | ns                  | ns               | **                 | **                 | **                 | /                   | /                   |
|                     | r       | /             | /                   | /                | -0.7191            | -0.6744            | -0.6708            | /                   | /                   |
|                     | 95% CI  | /             | /                   | /                | (-0.9031, -0.3124) | (-0.8857, -0.2318) | (-0.8843, -0.2257) | /                   | /                   |
| Highest Score (all) | p value | ns            | ns                  | ns               | ****               | ***                | **                 | *                   | ns                  |
|                     | r       | /             | /                   | /                | -0.7177            | -0.6068            | -0.5158            | -0.4031             | /                   |
|                     | 95% CI  | /             | /                   | /                | (-0.8453, -0.5128) | (-0.7904, -0.3234) | (-0.7348, -0.1994) | (-0.6433, -0.09067) | /                   |
| Highest Score (vax) | p value | ns            | *                   | *                | ns                 | ns                 | *                  | *                   | /                   |
|                     | r       | /             | 0.5643              | 0.6453           | /                  | /                  | -0.6238            | -0.3741             | /                   |
|                     | 95% CI  | /             | (0.0008807, 0.8558) | (0.1283, 0.8865) | /                  | /                  | (-0.8653, -0.1475) | (-0.6288, -0.05671) | /                   |

Correlations are based on Spearman's r coefficient (non-parametric), 95% Confidence Intervals were calculated, and a two tailed p value was determined. \* P<0.05, \*\* P<0.01, \*\*\* P<0.001, \*\*\*\* P<0.0001

## Supplemental Figure 1

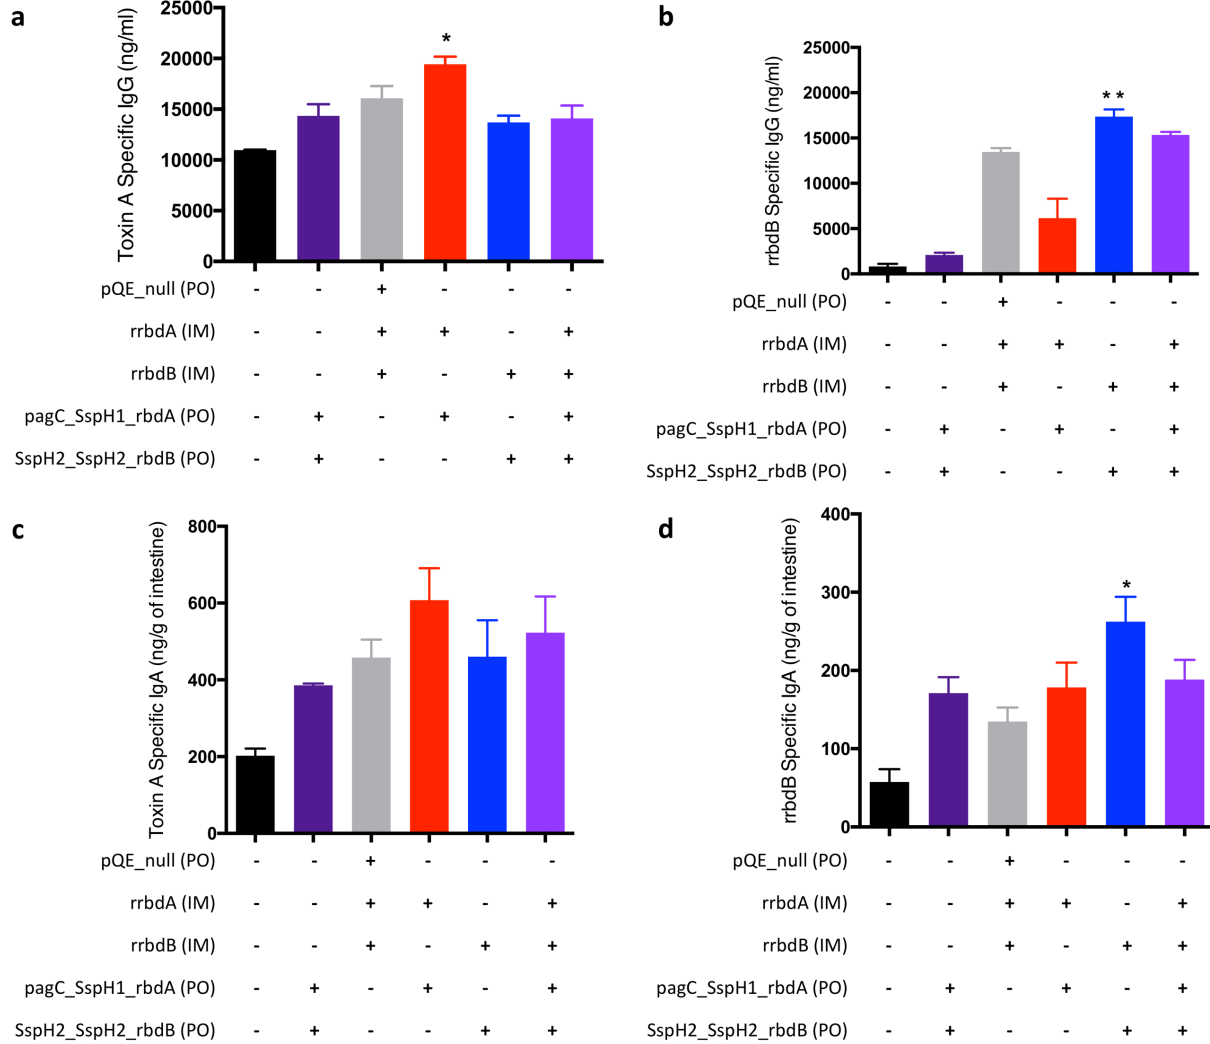

Vaccination with antigen expressing YS1646 increases post-challenge antibody titers in the sera and intestines of survivors. Mice were immunised with a dose of 10 $\mu$ g recombinant antigen (rrbdA and/or rrdB) intramuscularly, and three doses of 1x10<sup>9</sup> cfu of antigen expressing YS1646 (pagC\_SspH1\_rbdA and/or SspH2\_SspH2\_rbdB), orally every other day. 5 weeks after vaccination, mice were challenged with 1.7x10<sup>7</sup> cfu of *C. difficile*. 3 weeks after infection, serum and intestines were collected from survivors. Post-challenge serum toxin A specific IgG antibodies (**a**) and rrdB specific IgG antibodies (**b**) were detected by ELISA. Intestinal toxin A specific IgA antibodies (**c**) and rrdB specific IgA antibodies (**d**) were detected by ELISA (n= 2-8, one experiment). Mean and standard error of the mean (SEM) are shown. Kruskal-Wallis test and Dunn's Multiple Comparison test were used to compare between all groups. \* P<0.05, \*\* P<0.01, \*\*\* P<0.001, \*\*\*\* P<0.0001 compared to the PBS control group.
